# Supplementary material for: The Causal Effect of COVID-19 on Chronic Mastoiditis: A Bidirectional Two-Sample Mendelian Randomization-Based Study
Source: Research Square preprint supplement (doi:10.21203/rs.3.rs-3304410/v1), 2023-09-01
Supplement: Supplementary file 1 [file 6d83da9815a99c9e1009a265.xlsx]

## Sheet: Sheet1
Table S1 | Phenotype source and description
Phenotypes || Phenocode	PMID	First Author&Year	Sample Size	N Cases	N Controls	Population
Exposure traits
Infected Covid-19 || C2_ALL_eur_leave_23andme	35255492	Kousathanas&2022	2597856	122616	2475240	European
Hospitalized Covid-19 || B2_ALL_eur_leave_23andme	35255492	Kousathanas&2022	2095324	32519	2062805	European
Severe Covid-19 || A2_ALL_eur_leave_23andme	35255492	Kousathanas&2022	1086211	13769	1072442	European
Outcome trait
Chronic mastoiditis || H8_MASTCHRON	36653562	Kurki&2023	353298	727	352571	European
