# Supplementary material for: The Causal Effect of COVID-19 on Chronic Mastoiditis: A Bidirectional Two-Sample Mendelian Randomization-Based Study
Source: Research Square preprint supplement (doi:10.21203/rs.3.rs-3304410/v1), 2023-09-01
Supplement: Supplementary file 3 [file f8e7426c11df38780295755d.xlsx]

## Sheet: sheet 1
Exposures	Outcome	SNP	effect_allele.exposure	other_allele.exposure	effect_allele.outcome	other_allele.outcome	beta.exposure	beta.outcome	eaf.exposure	eaf.outcome	chr	pos	pval.outcome	se.outcome	samplesize.outcome	ncase.outcome	ncontrol.outcome	ncase.exposure	ncontrol.exposure	se.exposure	pval.exposure	sd.outcome	sd.exposure	F.stat
Infected Covid-19	Chronic mastoiditis	rs10774673	T	C	T	C	0.028916	0.128655	NA	0.728072	12	112923353	0.0291904	0.0589914	353298	727	352571	122616	2475240	0.0048301	2.14e-09	35.0638	7.78509	2.55996
Infected Covid-19	Chronic mastoiditis	rs1123573	A	G	A	G	0.026386	0.0493405	NA	0.666126	2	60480453	0.377696	0.0559321	353298	727	352571	122616	2475240	0.0047693	3.16e-08	33.2454	7.68709	2.18629
Infected Covid-19	Chronic mastoiditis	rs11264339	C	T	C	T	0.035023	0.0780328	NA	0.473468	1	155168172	0.139525	0.0528119	353298	727	352571	122616	2475240	0.0045618	1.62e-14	31.3908	7.35265	4.21021
Infected Covid-19	Chronic mastoiditis	rs12610495	G	A	G	A	0.049515	0.108842	NA	0.342059	19	4717660	0.0508733	0.0557437	353298	727	352571	122616	2475240	0.0050773	1.8e-22	33.1334	8.18352	6.79325
Infected Covid-19	Chronic mastoiditis	rs184781326	A	G	A	G	0.06902	0.137812	NA	0.9453	14	28986160	0.252036	0.120316	353298	727	352571	122616	2475240	0.011679	3.42e-09	71.5145	18.8241	2.49464
Infected Covid-19	Chronic mastoiditis	rs2260685	C	T	C	T	0.033425	-0.0711614	NA	0.539003	3	195770872	0.177949	0.0528257	353298	727	352571	122616	2475240	0.0046886	1.01e-12	31.399	7.55702	3.63016
Infected Covid-19	Chronic mastoiditis	rs2290859	C	T	C	T	0.050838	0.0477721	NA	0.637381	3	101806781	0.383645	0.0548349	353298	727	352571	122616	2475240	0.0048604	1.32e-25	32.5932	7.83393	7.81453
Infected Covid-19	Chronic mastoiditis	rs2834158	T	C	T	C	0.040547	0.0118396	NA	0.375561	21	33244908	0.828026	0.0545016	353298	727	352571	122616	2475240	0.0048711	8.51e-17	32.3951	7.85117	4.94918
Infected Covid-19	Chronic mastoiditis	rs35044562	G	A	G	A	0.12798	0.0180984	NA	0.080734	3	45867532	0.851203	0.0964823	353298	727	352571	122616	2475240	0.0084762	1.64e-51	57.348	13.6618	16.2836
Infected Covid-19	Chronic mastoiditis	rs554833	T	C	T	C	0.090799	0.158635	NA	0.3718	9	133268896	0.00221539	0.051846	353298	727	352571	122616	2475240	0.0047649	5.87e-81	30.8167	7.68	25.9373
Infected Covid-19	Chronic mastoiditis	rs676314	G	A	G	A	0.027577	0.0285692	NA	0.313118	19	50362278	0.613966	0.0566375	353298	727	352571	122616	2475240	0.0048146	1.02e-08	33.6647	7.76011	2.34338
Infected Covid-19	Chronic mastoiditis	rs7118388	G	A	G	A	0.026551	-0.0131184	NA	0.512962	11	34432600	0.803804	0.0528058	353298	727	352571	122616	2475240	0.0045331	4.71e-09	31.3872	7.30639	2.45042
Infected Covid-19	Chronic mastoiditis	rs73062389	A	G	A	G	0.20044	0.0313365	NA	0.0263303	3	45793925	0.844465	0.159729	353298	727	352571	122616	2475240	0.0098613	7.61e-92	94.9411	15.8943	29.5101
Infected Covid-19	Chronic mastoiditis	rs9264740	C	T	C	T	0.030474	-0.0576362	NA	0.307588	6	31276554	0.313763	0.0572152	353298	727	352571	122616	2475240	0.0052595	6.87e-09	34.0081	8.47719	2.39795
																								113.561
Hospitalized Covid-19	Chronic mastoiditis	rs1123573	A	G	A	G	0.068848	0.049341	NA	0.666126	2	60480453	0.377696	0.055932	353298	727	352571	32519	2062805	0.010432	4.13e-11	33.2454	15.1006	1.45185
Hospitalized Covid-19	Chronic mastoiditis	rs117169628	A	G	A	G	0.10114	0.072292	NA	0.121974	16	89196249	0.363484	0.079551	353298	727	352571	32519	2062805	0.013651	1.27e-13	47.2844	19.7601	1.82974
Hospitalized Covid-19	Chronic mastoiditis	rs12610495	G	A	G	A	0.14828	0.108842	NA	0.342059	19	4717660	0.050873	0.055744	353298	727	352571	32519	2062805	0.011043	4.21e-41	33.1334	15.985	6.00985
Hospitalized Covid-19	Chronic mastoiditis	rs139589338	G	A	G	A	0.20902	-0.03038	NA	0.020562	1	155000000	0.870264	0.185981	353298	727	352571	32519	2062805	0.03574	4.97e-09	110.545	51.7345	1.14009
Hospitalized Covid-19	Chronic mastoiditis	rs149533170	A	G	A	G	0.28389	-0.47914	NA	0.002441	9	21172826	0.379569	0.545285	353298	727	352571	32519	2062805	0.051106	2.78e-08	324.111	73.9771	1.02856
Hospitalized Covid-19	Chronic mastoiditis	rs1498399	G	A	G	A	0.068773	0.013981	NA	0.413558	1	77481554	0.79382	0.053494	353298	727	352571	32519	2062805	0.010063	8.24e-12	31.7959	14.5664	1.55688
Hospitalized Covid-19	Chronic mastoiditis	rs1634761	C	T	C	T	0.067678	-0.09716	NA	0.494476	6	31306250	0.065079	0.05267	353298	727	352571	32519	2062805	0.009495	1.02e-12	31.3063	13.7444	1.69344
Hospitalized Covid-19	Chronic mastoiditis	rs17279437	G	A	G	A	0.11372	0.020408	NA	0.901007	3	45772602	0.816655	0.088021	353298	727	352571	32519	2062805	0.016819	1.37e-11	52.3188	24.3459	1.52386
Hospitalized Covid-19	Chronic mastoiditis	rs17412601	T	C	T	C	0.068259	0.041493	NA	0.636763	3	102000000	0.449142	0.054823	353298	727	352571	32519	2062805	0.010317	3.69e-11	32.5862	14.9341	1.4591
Hospitalized Covid-19	Chronic mastoiditis	rs17885848	T	C	T	C	0.061114	-0.07173	NA	0.3529	10	79558486	0.201852	0.056205	353298	727	352571	32519	2062805	0.010877	1.93e-08	33.4078	15.7447	1.05229
Hospitalized Covid-19	Chronic mastoiditis	rs2102497	C	T	C	T	0.064371	0.027306	NA	0.720183	16	54221310	0.641422	0.058632	353298	727	352571	32519	2062805	0.011743	4.21e-08	34.8503	16.9983	1.0016
Hospitalized Covid-19	Chronic mastoiditis	rs2326562	T	C	T	C	0.053141	0.061476	NA	0.427024	8	60515641	0.249392	0.053373	353298	727	352571	32519	2062805	0.009736	4.81e-08	31.7243	14.0935	0.992989
Hospitalized Covid-19	Chronic mastoiditis	rs2897075	T	C	T	C	0.058531	-0.04115	NA	0.385579	7	100000000	0.447538	0.054178	353298	727	352571	32519	2062805	0.009857	2.88e-09	32.2026	14.2682	1.17532
Hospitalized Covid-19	Chronic mastoiditis	rs3014983	C	T	C	T	0.069511	0.067333	NA	0.32938	1	64995008	0.233498	0.056516	353298	727	352571	32519	2062805	0.012003	6.99e-09	33.5926	17.3746	1.11789
Hospitalized Covid-19	Chronic mastoiditis	rs34712979	G	A	G	A	0.064307	-0.01466	NA	0.743816	4	106000000	0.809488	0.060808	353298	727	352571	32519	2062805	0.011488	2.17e-08	36.1433	16.6291	1.04448
Hospitalized Covid-19	Chronic mastoiditis	rs35705950	G	T	G	T	0.098933	-0.00615	NA	0.897803	11	1219991	0.945144	0.089389	353298	727	352571	32519	2062805	0.015532	1.9e-10	53.1319	22.4829	1.35238
Hospitalized Covid-19	Chronic mastoiditis	rs41264915	A	G	A	G	0.14296	0.016848	NA	0.949006	1	155000000	0.888596	0.120272	353298	727	352571	32519	2062805	0.015375	1.43e-20	71.4883	22.2557	2.88185
Hospitalized Covid-19	Chronic mastoiditis	rs4475253	G	A	G	A	0.058194	-0.01376	NA	0.324333	5	132000000	0.806897	0.056297	353298	727	352571	32519	2062805	0.010052	7.07e-09	33.4625	14.5505	1.11718
Hospitalized Covid-19	Chronic mastoiditis	rs45524632	A	C	A	C	0.22336	0.230325	NA	0.015096	19	10486312	0.283923	0.214946	353298	727	352571	32519	2062805	0.034592	1.07e-10	127.761	50.0727	1.38974
Hospitalized Covid-19	Chronic mastoiditis	rs4767025	T	C	T	C	0.07545	0.128653	NA	0.728073	12	113000000	0.029192	0.058991	353298	727	352571	32519	2062805	0.010079	7.13e-14	35.0638	14.5896	1.86791
Hospitalized Covid-19	Chronic mastoiditis	rs492602	A	G	A	G	0.055036	0.083252	NA	0.624785	19	48703160	0.125112	0.054283	353298	727	352571	32519	2062805	0.009534	7.81e-09	32.2653	13.8008	1.11073
Hospitalized Covid-19	Chronic mastoiditis	rs5023077	T	C	T	C	0.06608	0.096428	NA	0.512465	12	133000000	0.067977	0.052832	353298	727	352571	32519	2062805	0.009515	3.79e-12	31.403	13.7729	1.60773
Hospitalized Covid-19	Chronic mastoiditis	rs61882275	G	A	G	A	0.091959	-0.00196	NA	0.742497	11	34482745	0.973888	0.060011	353298	727	352571	32519	2062805	0.009945	2.3e-20	35.6696	14.3949	2.85033
Hospitalized Covid-19	Chronic mastoiditis	rs63750417	C	T	C	T	0.091763	-0.07843	NA	0.917416	17	45983409	0.404894	0.09416	353298	727	352571	32519	2062805	0.011487	1.37e-15	55.9674	16.6277	2.12713
Hospitalized Covid-19	Chronic mastoiditis	rs657152	A	C	A	C	0.10009	0.135784	NA	0.3996	9	133000000	0.008754	0.051796	353298	727	352571	32519	2062805	0.009764	1.18e-24	30.7872	14.1342	3.50238
Hospitalized Covid-19	Chronic mastoiditis	rs676314	G	A	G	A	0.077962	0.028569	NA	0.313118	19	50362278	0.613966	0.056638	353298	727	352571	32519	2062805	0.010055	8.95e-15	33.6647	14.5549	2.00389
Hospitalized Covid-19	Chronic mastoiditis	rs67959919	A	G	A	G	0.49158	0.02287	NA	0.080398	3	45830416	0.812321	0.09632	353298	727	352571	32519	2062805	0.017513	2.36e-173	57.2515	25.3505	26.2627
Hospitalized Covid-19	Chronic mastoiditis	rs78295726	T	C	T	C	0.073968	-0.04682	NA	0.137321	19	10315836	0.541644	0.076721	353298	727	352571	32519	2062805	0.013044	1.42e-08	45.6019	18.8815	1.07186
Hospitalized Covid-19	Chronic mastoiditis	rs78314212	T	C	T	C	0.122	0.143368	NA	0.082784	21	33940612	0.135726	0.096098	353298	727	352571	32519	2062805	0.017175	1.22e-12	57.1193	24.8612	1.68189
Hospitalized Covid-19	Chronic mastoiditis	rs9636867	G	A	G	A	0.12824	0.018944	NA	0.374447	21	33237639	0.728489	0.054573	353298	727	352571	32519	2062805	0.010176	2.05e-36	32.4378	14.73	5.29378
																								80.1995
Severe Covid-19	Chronic mastoiditis	rs10066378	C	T	C	T	0.11796	0.019755	NA	0.103707	5	132000000	0.817892	0.085796	353298	727	352571	13769	1072442	0.021006	1.96e-08	50.9961	21.8928	1.3139
Severe Covid-19	Chronic mastoiditis	rs10850097	T	C	T	C	0.095247	0.128654	NA	0.728072	12	113000000	0.02919	0.058991	353298	727	352571	13769	1072442	0.014916	1.71e-10	35.0638	15.5457	1.69894
Severe Covid-19	Chronic mastoiditis	rs1123573	A	G	A	G	0.10621	0.049341	NA	0.666126	2	60480453	0.377696	0.055932	353298	727	352571	13769	1072442	0.0152	2.8e-12	33.2454	15.8417	2.03434
Severe Covid-19	Chronic mastoiditis	rs1128175	A	G	A	G	0.1255	-0.04237	NA	0.300979	6	31182658	0.462345	0.057645	353298	727	352571	13769	1072442	0.017115	2.25e-13	34.2635	17.8375	2.24034
Severe Covid-19	Chronic mastoiditis	rs11614702	A	G	A	G	0.10135	0.09986	NA	0.500181	12	132000000	0.059975	0.053089	353298	727	352571	13769	1072442	0.01383	2.33e-13	31.5557	14.4138	2.2376
Severe Covid-19	Chronic mastoiditis	rs117169628	A	G	A	G	0.15749	0.072292	NA	0.121974	16	89196249	0.363484	0.079551	353298	727	352571	13769	1072442	0.020078	4.36e-15	47.2844	20.9256	2.56357
Severe Covid-19	Chronic mastoiditis	rs12534422	T	C	T	C	0.085624	-0.02856	NA	0.240718	7	75634474	0.643726	0.06176	353298	727	352571	13769	1072442	0.015073	1.34e-08	36.7093	15.7093	1.34453
Severe Covid-19	Chronic mastoiditis	rs12610495	G	A	G	A	0.24167	0.108842	NA	0.342059	19	4717660	0.050873	0.055744	353298	727	352571	13769	1072442	0.016049	3.05e-51	33.1334	16.7265	9.44777
Severe Covid-19	Chronic mastoiditis	rs12614007	A	G	A	G	0.094133	0.012127	NA	0.72193	2	57089368	0.836871	0.058898	353298	727	352571	13769	1072442	0.016881	2.46e-08	35.0084	17.5936	1.29559
Severe Covid-19	Chronic mastoiditis	rs17279437	G	A	G	A	0.17214	0.020408	NA	0.901007	3	45772602	0.816655	0.088021	353298	727	352571	13769	1072442	0.025124	7.29e-12	52.3188	26.1846	1.95599
Severe Covid-19	Chronic mastoiditis	rs17713054	A	G	A	G	0.75584	0.02395	NA	0.080313	3	45818159	0.803632	0.096321	353298	727	352571	13769	1072442	0.026008	1.09e-185	57.2523	27.1059	35.1905
Severe Covid-19	Chronic mastoiditis	rs17885848	T	C	T	C	0.090196	-0.07173	NA	0.3529	10	79558486	0.201852	0.056205	353298	727	352571	13769	1072442	0.015623	7.78e-09	33.4078	16.2825	1.38875
Severe Covid-19	Chronic mastoiditis	rs2236645	T	C	T	C	0.17941	0.155763	NA	0.092317	21	33969937	0.089359	0.09169	353298	727	352571	13769	1072442	0.024951	6.46e-13	54.4997	26.0043	2.15425
Severe Covid-19	Chronic mastoiditis	rs2897075	T	C	T	C	0.087987	-0.04115	NA	0.385579	7	100000000	0.447538	0.054178	353298	727	352571	13769	1072442	0.014375	9.32e-10	32.2026	14.9818	1.56099
Severe Covid-19	Chronic mastoiditis	rs343320	A	G	A	G	0.15423	0.119741	NA	0.04877	3	147000000	0.331063	0.123194	353298	727	352571	13769	1072442	0.027508	2.06e-08	73.2251	28.6692	1.30978
Severe Covid-19	Chronic mastoiditis	rs34712979	G	A	G	A	0.10951	-0.01466	NA	0.743816	4	106000000	0.809488	0.060808	353298	727	352571	13769	1072442	0.01701	1.21e-10	36.1433	17.7281	1.72694
Severe Covid-19	Chronic mastoiditis	rs35705950	G	T	G	T	0.1636	-0.00615	NA	0.897803	11	1219991	0.945144	0.089389	353298	727	352571	13769	1072442	0.022785	6.95e-13	53.1319	23.7469	2.14807
Severe Covid-19	Chronic mastoiditis	rs368565	T	C	T	C	0.1056	-0.00042	NA	0.4722	19	48703346	0.993677	0.05259	353298	727	352571	13769	1072442	0.014909	1.41e-12	31.2591	15.5384	2.09031
Severe Covid-19	Chronic mastoiditis	rs41264915	A	G	A	G	0.20626	0.016848	NA	0.949006	1	155000000	0.888596	0.120272	353298	727	352571	13769	1072442	0.022896	2.09e-19	71.4883	23.8625	3.38135
Severe Covid-19	Chronic mastoiditis	rs568035	T	C	T	C	0.14307	-0.05092	NA	0.053197	1	156000000	0.667595	0.118562	353298	727	352571	13769	1072442	0.025967	3.6e-08	70.4719	27.0632	1.26483
Severe Covid-19	Chronic mastoiditis	rs60132559	T	C	T	C	0.091456	0.029777	NA	0.312853	19	50363849	0.599044	0.056634	353298	727	352571	13769	1072442	0.015009	1.11e-09	33.6626	15.6426	1.54704
Severe Covid-19	Chronic mastoiditis	rs61882275	G	A	G	A	0.12605	-0.00196	NA	0.742497	11	34482745	0.973888	0.060011	353298	727	352571	13769	1072442	0.014659	8.08e-18	35.6696	15.2778	3.08075
Severe Covid-19	Chronic mastoiditis	rs62056905	A	G	A	G	0.1285	-0.07837	NA	0.917401	17	45705327	0.405152	0.094145	353298	727	352571	13769	1072442	0.016821	2.18e-14	55.9588	17.5311	2.43154
Severe Covid-19	Chronic mastoiditis	rs9636867	G	A	G	A	0.18394	0.018944	NA	0.374447	21	33237639	0.728489	0.054573	353298	727	352571	13769	1072442	0.015088	3.47e-34	32.4378	15.7249	6.19254
																								91.6002

## Sheet: Sheet2
Exposures	SNP (Proxy SNPs are marked in bold)	proxy	effect_allele.exposure	other_allele.exposure	effect_allele.outcome	other_allele.outcome	beta.exposure	beta.outcome	eaf.exposure	eaf.outcome	chr.outcome	pos.outcome	se.outcome	pval.outcome	outcome	samplesize.outcome	ncase.outcome	ncontrol.outcome	se.exposure	pval.exposure	exposure	sd.outcome	sd.exposure	Fstat1
Adult-onset Still's disease	rs11513729		T	C	T	C	0.1555	0.000235616	0.38	0.41121	12	112273499	0.000204977	0.250362	female_np	193446	728	192718	0.026	2.12598e-09	Adult-onset Still disease || id:finn-b-STILL_ADULT	0.090154	11.684	7.15378
Adult-onset Still's disease	rs34434863		G	T	G	T	0.6185	0.00112071	0.3394	0.308252	6	32559673	0.000220312	3.64241e-07	female_np	193446	728	192718	0.0352	4.43711e-69	Adult-onset Still disease || id:finn-b-STILL_ADULT	0.0968987	15.8184	61.7469
Adult-onset Still's disease	rs6679677		A	C	A	C	0.3921	0.000972956	0.1468	0.101939	1	114303808	0.000328457	0.00305479	female_np	193446	728	192718	0.0366	9.01156e-27	Adult-onset Still disease || id:finn-b-STILL_ADULT	0.144464	16.4475	22.9537
Adult-onset Still's disease	rs9264277		C	T	C	T	0.2172	0.000575245	0.7296	0.631288	6	31224667	0.000206881	0.00542699	female_np	193446	728	192718	0.0293	1.31492e-13	Adult-onset Still disease || id:finn-b-STILL_ADULT	0.0909914	13.167	10.9902
Adult-onset Still's disease	rs9265947		C	T	C	T	0.249	0.000595849	0.7373	0.640365	6	31315165	0.000208396	0.00424736	female_np	193446	728	192718	0.0299	8.50942e-17	Adult-onset Still disease || id:finn-b-STILL_ADULT	0.0916578	13.4366	13.87
Exposure	Outcomes	SNP	effect_allele.exposure	other_allele.exposure	effect_allele.outcome	other_allele.outcome	beta.exposure	beta.outcome	eaf.exposure	eaf.outcome	chr	pos	se.outcome	pval.outcome	samplesize.outcome	ncase.outcome	ncontrol.outcome	pval.exposure	se.exposure	ncase.exposure	ncontrol.exposure	samplesize.exposure	sd.outcome	sd.exposure	F.stat
Chronic mastoiditis	Infected Covid-19	rs1156186	C	A	C	A	0.304961	0.000178	0.156411	0.1686	9	22900998	0.006254	0.9773	2597856	122616	2475240	4.84e-06	0.06671	727	352571	353298	10.0796	39.6514	2.98543
Chronic mastoiditis	Infected Covid-19	rs12069336	A	G	A	G	0.501722	0.003196	0.912337	0.8598	1	162000000	0.006396	0.61726	2597856	122616	2475240	1.48e-06	0.104215	727	352571	353298	10.3093	61.9442	3.31101
Chronic mastoiditis	Infected Covid-19	rs17138968	G	T	G	T	0.998993	0.002868	0.972461	0.97805	16	5943375	0.017868	0.87248	2597856	122616	2475240	4.1e-06	0.216873	727	352571	353298	28.7994	128.907	3.03116
Chronic mastoiditis	Infected Covid-19	rs187288323	G	A	G	A	0.732148	-0.01067	0.954999	0.96624	8	27850173	0.014317	0.45607	2597856	122616	2475240	3.83e-06	0.158469	727	352571	353298	23.0759	94.1922	3.04933
Chronic mastoiditis	Infected Covid-19	rs394845	T	C	T	C	0.388548	-0.00763	0.786604	0.8091	15	58735472	0.006025	0.20562	2597856	122616	2475240	8.57e-09	0.067494	727	352571	353298	9.7115	40.1177	4.73428
Chronic mastoiditis	Infected Covid-19	rs7557276	G	A	G	A	0.238065	0.001623	0.407933	0.4367	2	122000000	0.004752	0.73271	2597856	122616	2475240	4.93e-06	0.052119	727	352571	353298	7.65953	30.9791	2.9805
Chronic mastoiditis	Infected Covid-19	rs75983644	C	T	C	T	0.582267	0.019834	0.934513	0.9447	13	62343420	0.010186	0.051517	2597856	122616	2475240	1.8e-06	0.121959	727	352571	353298	16.4177	72.4911	3.2562
																									23.3479
Chronic mastoiditis	Hospitalized Covid-19	rs1156186	C	A	C	A	0.304961	-0.00036	0.156411	0.1682	9	22900998	0.01381	0.97936	2095324	32519	2062805	4.84e-06	0.06671	727	352571	353298	19.9903	39.6514	2.98543
Chronic mastoiditis	Hospitalized Covid-19	rs12069336	A	G	A	G	0.501722	-0.00828	0.912337	0.8617	1	162000000	0.013327	0.53418	2095324	32519	2062805	1.48e-06	0.104215	727	352571	353298	19.2911	61.9442	3.31101
Chronic mastoiditis	Hospitalized Covid-19	rs17138968	G	T	G	T	0.998993	0.010452	0.972461	0.97747	16	5943375	0.039991	0.79382	2095324	32519	2062805	4.1e-06	0.216873	727	352571	353298	57.8879	128.907	3.03116
Chronic mastoiditis	Hospitalized Covid-19	rs187288323	G	A	G	A	0.732148	-0.01272	0.954999	0.96685	8	27850173	0.031787	0.68893	2095324	32519	2062805	3.83e-06	0.158469	727	352571	353298	46.0124	94.1922	3.04933
Chronic mastoiditis	Hospitalized Covid-19	rs394845	T	C	T	C	0.388548	-0.00277	0.786604	0.8105	15	58735472	0.012407	0.82333	2095324	32519	2062805	8.57e-09	0.067494	727	352571	353298	17.9594	40.1177	4.73428
Chronic mastoiditis	Hospitalized Covid-19	rs7557276	G	A	G	A	0.238065	0.00743	0.407933	0.4346	2	122000000	0.010367	0.47355	2095324	32519	2062805	4.93e-06	0.052119	727	352571	353298	15.0065	30.9791	2.9805
Chronic mastoiditis	Hospitalized Covid-19	rs75983644	C	T	C	T	0.582267	0.023465	0.934513	0.94409	13	62343420	0.021721	0.28001	2095324	32519	2062805	1.8e-06	0.121959	727	352571	353298	31.4417	72.4911	3.2562
																									23.3479
Chronic mastoiditis	Severe Covid-19	rs1156186	C	A	C	A	0.304961	-0.00025	0.156411	0.1639	9	22900998	0.020189	0.99021	1086211	13769	1072442	4.84e-06	0.06671	727	352571	353298	21.0413	39.6514	2.98543
Chronic mastoiditis	Severe Covid-19	rs12069336	A	G	A	G	0.501722	0.004746	0.912337	0.8675	1	162000000	0.01978	0.81036	1086211	13769	1072442	1.48e-06	0.104215	727	352571	353298	20.615	61.9442	3.31101
Chronic mastoiditis	Severe Covid-19	rs17138968	G	T	G	T	0.998993	0.031701	0.972461	0.97829	16	5943375	0.057584	0.58197	1086211	13769	1072442	4.1e-06	0.216873	727	352571	353298	60.0149	128.907	3.03116
Chronic mastoiditis	Severe Covid-19	rs187288323	G	A	G	A	0.732148	-0.03307	0.954999	0.97125	8	27850173	0.046287	0.4749	1086211	13769	1072442	3.83e-06	0.158469	727	352571	353298	48.241	94.1922	3.04933
Chronic mastoiditis	Severe Covid-19	rs394845	T	C	T	C	0.388548	-0.02324	0.786604	0.8038	15	58735472	0.018159	0.20053	1086211	13769	1072442	8.57e-09	0.067494	727	352571	353298	18.9256	40.1177	4.73428
Chronic mastoiditis	Severe Covid-19	rs7557276	G	A	G	A	0.238065	0.010429	0.407933	0.4332	2	122000000	0.01496	0.4857	1086211	13769	1072442	4.93e-06	0.052119	727	352571	353298	15.5915	30.9791	2.9805
Chronic mastoiditis	Severe Covid-19	rs75983644	C	T	C	T	0.582267	-0.0156	0.934513	0.94298	13	62343420	0.032333	0.62946	1086211	13769	1072442	1.8e-06	0.121959	727	352571	353298	33.6979	72.4911	3.2562
																									23.3479
